# Supplementary material for: System for Rapid, Precise Modulation of Intraocular Pressure, toward Minimally-Invasive In Vivo Measurement of Intracranial Pressure
Source: PLoS One. 2016 Jan 15;11(1):e0147020. doi: 10.1371/journal.pone.0147020 (PMC4714900; doi:10.1371/journal.pone.0147020)
Supplement: S6 Dataset — (XLSX) [file pone.0147020.s006.xlsx]

## Sheet: Sheet1
Time	Subdural ICP	Lateral Ventricle ICP
(sec)	(mmHg)	(mmHg)
0	6.1681	6.3678
0.005	6.2144	6.2968
0.01	6.2915	6.4641
0.015	6.384	6.53
0.02	6.3583	6.6314
0.025	6.4406	6.6872
0.03	6.5691	6.8139
0.035	6.5177	6.7531
0.04	6.5228	6.6821
0.045	6.6616	6.7936
0.05	6.5948	6.8697
0.055	6.5845	6.7227
0.06	6.6462	6.7835
0.065	6.7592	6.8697
0.07	6.6667	6.8038
0.075	6.6564	6.8342
0.08	6.7541	6.7835
0.085	6.6924	6.7987
0.09	6.6153	6.7936
0.095	6.677	6.7429
0.1	6.6821	6.6973
0.105	6.6153	6.7176
0.11	6.6205	6.7227
0.115	6.8004	6.8748
0.12	6.5485	6.6821
0.125	6.6462	6.7632
0.13	6.6719	6.7227
0.135	6.7181	6.6821
0.14	6.5948	6.6922
0.145	6.605	6.7125
0.15	6.6873	6.7074
0.155	6.5896	6.6162
0.16	6.5536	6.6567
0.165	6.6616	6.6618
0.17	6.5588	6.6314
0.175	6.4714	6.6365
0.18	6.5074	6.6263
0.185	6.5434	6.6162
0.19	6.4457	6.53
0.195	6.5125	6.5401
0.2	6.5279	6.6213
0.205	6.5022	6.53
0.21	6.42	6.5401
0.215	6.492	6.5401
0.22	6.384	6.4641
0.225	6.3429	6.4641
0.23	6.4303	6.5351
0.235	6.3583	6.3982
0.24	6.3223	6.3678
0.245	6.3326	6.4438
0.25	6.3429	6.5047
0.255	6.2607	6.3424
0.26	6.2966	6.3323
0.265	6.2966	6.388
0.27	6.2144	6.3779
0.275	6.2555	6.3424
0.28	6.163	6.4286
0.285	6.1784	6.3475
0.29	6.0756	6.2968
0.295	6.2298	6.383
0.3	6.2401	6.3221
0.305	6.1527	6.2714
0.31	6.2041	6.3272
0.315	6.1527	6.3779
0.32	6.1322	6.2714
0.325	6.1424	6.2359
0.33	6.1887	6.2562
0.335	6.1322	6.1751
0.34	6.1167	6.2055
0.345	6.1219	6.2613
0.35	6.0962	6.3576
0.355	6.1373	6.2866
0.36	6.2041	6.459
0.365	6.384	6.606
0.37	6.3378	6.6111
0.375	6.3892	6.6517
0.38	6.4251	6.7581
0.385	6.4097	6.6466
0.39	6.4714	6.6263
0.395	6.5896	6.7277
0.4	6.6564	6.7176
0.405	6.492	6.6821
0.41	6.605	6.6872
0.415	6.6616	6.8748
0.42	6.6564	6.7531
0.425	6.5639	6.677
0.43	6.713	6.7125
0.435	6.5588	6.6365
0.44	6.5177	6.6567
0.445	6.6924	6.5604
0.45	6.6153	6.6821
0.455	6.5022	6.7024
0.46	6.5331	6.7125
0.465	6.677	6.672
0.47	6.4971	6.5908
0.475	6.5434	6.6466
0.48	6.5896	6.6669
0.485	6.4457	6.6314
0.49	6.4714	6.5604
0.495	6.5074	6.6669
0.5	6.5382	6.5858
0.505	6.4508	6.5553
0.51	6.492	6.5858
0.515	6.4765	6.6314
0.52	6.4097	6.5148
0.525	6.3686	6.4844
0.53	6.4097	6.53
0.535	6.4097	6.4894
0.54	6.3635	6.4641
0.545	6.3686	6.5503
0.55	6.42	6.5047
0.555	6.3994	6.4844
0.56	6.3069	6.4134
0.565	6.3686	6.4793
0.57	6.2966	6.3678
0.575	6.2401	6.4134
0.58	6.2452	6.3627
0.585	6.3018	6.3982
0.59	6.0859	6.2866
0.595	6.2452	6.3779
0.6	6.2555	6.2816
0.605	6.127	6.2055
0.61	6.1887	6.312
0.615	6.2093	6.3576
0.62	6.1527	6.2968
0.625	6.1373	6.2461
0.63	6.1938	6.3221
0.635	6.1733	6.17
0.64	6.0602	6.2157
0.645	6.1476	6.312
0.65	6.127	6.3221
0.655	6.1065	6.241
0.66	6.0191	6.2765
0.665	6.0705	6.241
0.67	6.0499	6.0991
0.675	6.1219	6.2613
0.68	6.1116	6.1802
0.685	6.0037	6.2258
0.69	5.8751	6.1548
0.695	6.0551	6.2258
0.7	6.1887	6.3221
0.705	6.1116	6.241
0.71	6.1424	6.4134
0.715	6.2658	6.6213
0.72	6.3223	6.459
0.725	6.3121	6.5706
0.73	6.492	6.6162
0.735	6.3429	6.6111
0.74	6.4354	6.5858
0.745	6.4714	6.6517
0.75	6.5948	6.6415
0.755	6.4611	6.5351
0.76	6.5125	6.6162
0.765	6.5896	6.5959
0.77	6.4457	6.5908
0.775	6.4354	6.6162
0.78	6.5639	6.5655
0.785	6.4868	6.606
0.79	6.42	6.4945
0.795	6.456	6.5908
0.8	6.5691	6.5706
0.805	6.4097	6.5199
0.81	6.456	6.6111
0.815	6.5125	6.6821
0.82	6.5279	6.5604
0.825	6.4868	6.5756
0.83	6.5228	6.6365
0.835	6.4406	6.601
0.84	6.4046	6.4793
0.845	6.4971	6.5249
0.85	6.42	6.53
0.855	6.3686	6.53
0.86	6.3892	6.4996
0.865	6.3532	6.4438
0.87	6.2555	6.4083
0.875	6.3429	6.4894
0.88	6.3326	6.4692
0.885	6.3532	6.4894
0.89	6.2195	6.3424
0.895	6.2658	6.4286
0.9	6.3275	6.4185
0.905	6.235	6.4083
0.91	6.2041	6.3323
0.915	6.3223	6.3526
0.92	6.199	6.2714
0.925	6.1065	6.3272
0.93	6.2709	6.3779
0.935	6.1527	6.3171
0.94	6.2041	6.1852
0.945	6.1784	6.3424
0.95	6.1887	6.3323
0.955	6.0808	6.2714
0.96	6.1013	6.2816
0.965	6.1784	6.2258
0.97	6.0551	6.1954
0.975	6.0859	6.2461
0.98	6.1065	6.2917
0.985	6.1116	6.2461
0.99	5.9882	6.1548
0.995	6.1681	6.2461
1	6.0499	6.2664
1.005	5.9934	6.094
1.01	5.9882	6.1244
1.015	6.0602	6.2258
1.02	5.9882	6.2207
1.025	5.9523	6.1903
1.03	5.9882	6.2157
1.035	5.9625	6.1447
1.04	5.942	6.1751
1.045	6.0653	6.2613
1.05	6.1167	6.3982
1.055	6.1013	6.3576
1.06	6.1836	6.4692
1.065	6.3018	6.5807
1.07	6.2401	6.5148
1.075	6.348	6.4844
1.08	6.4508	6.53
1.085	6.3121	6.6415
1.09	6.3326	6.4793
1.095	6.4611	6.6365
1.1	6.4611	6.6314
1.105	6.4971	6.5097
1.11	6.4457	6.5401
1.115	6.5125	6.6314
1.12	6.4817	6.5452
1.125	6.3583	6.454
1.13	6.4149	6.5807
1.135	6.4097	6.4235
1.14	6.3737	6.459
1.145	6.4765	6.5452
1.15	6.4611	6.5959
1.155	6.3275	6.4742
1.16	6.3892	6.5199
1.165	6.4868	6.5858
1.17	6.3789	6.5706
1.175	6.3892	6.4438
1.18	6.4508	6.5097
1.185	6.3583	6.4692
1.19	6.3121	6.4387
1.195	6.3737	6.5148
1.2	6.2966	6.4742
1.205	6.2144	6.4033
1.21	6.3532	6.3982
1.215	6.2709	6.4387
1.22	6.2709	6.3526
1.225	6.2298	6.4083
1.23	6.2709	6.5097
1.235	6.2864	6.3576
1.24	6.2041	6.2866
1.245	6.2298	6.3475
1.25	6.2504	6.2866
1.255	6.1887	6.2765
1.26	6.2247	6.2816
1.265	6.1784	6.2866
1.27	6.1116	6.2765
1.275	6.1116	6.2512
1.28	6.1887	6.3272
1.285	6.1322	6.1498
1.29	5.978	6.1802
1.295	6.1373	6.3069
1.3	6.127	6.2005
1.305	5.9368	6.2005
1.31	6.0191	6.2359
1.315	6.1065	6.312
1.32	5.9882	6.2005
1.325	5.9728	6.1599
1.33	6.091	6.2664
1.335	6.0396	6.165
1.34	5.978	6.1903
1.345	6.0448	6.2106
1.35	6.0859	6.1852
1.355	6.0037	6.1295
1.36	5.9574	6.1143
1.365	6.0499	6.1193
1.37	5.87	6.0585
1.375	5.8494	6.0889
1.38	5.9574	6.1802
1.385	5.9677	6.2664
1.39	5.9368	6.2359
1.395	6.0808	6.3019
1.4	6.1424	6.3475
1.405	6.1013	6.3424
1.41	6.1424	6.4235
1.415	6.2864	6.5604
1.42	6.2452	6.5097
1.425	6.2915	6.5351
1.43	6.3994	6.5908
1.435	6.3686	6.4996
1.44	6.3686	6.4793
1.445	6.42	6.4793
1.45	6.4303	6.6517
1.455	6.3737	6.6162
1.46	6.4149	6.5858
1.465	6.4457	6.5908
1.47	6.3583	6.3779
1.475	6.3635	6.5604
1.48	6.4868	6.5553
1.485	6.3532	6.3728
1.49	6.3583	6.4134
1.495	6.3892	6.5097
1.5	6.3635	6.4692
1.505	6.384	6.4387
1.51	6.2915	6.3982
1.515	6.4354	6.5655
1.52	6.3223	6.4337
1.525	6.3532	6.4185
1.53	6.4663	6.4235
1.535	6.2709	6.4083
1.54	6.2298	6.3526
1.545	6.3223	6.3678
1.55	6.3223	6.4134
1.555	6.2093	6.3627
1.56	6.2709	6.4033
1.565	6.2915	6.3323
1.57	6.2144	6.2917
1.575	6.1938	6.3272
1.58	6.2093	6.3779
1.585	6.163	6.3373
1.59	6.1065	6.2562
1.595	6.2041	6.3526
1.6	6.199	6.3373
1.605	6.1579	6.1802
1.61	6.1116	6.2359
1.615	6.199	6.2765
1.62	6.0808	6.2309
1.625	6.0191	6.1954
1.63	6.1065	6.3069
1.635	6.163	6.1295
1.64	6.0139	6.0788
1.645	5.978	6.1751
1.65	6.0705	6.1903
1.655	5.9882	6.17
1.66	6.0653	6.165
1.665	6.0396	6.1954
1.67	6.0088	6.1396
1.675	5.9368	6.1244
1.68	5.9625	6.1498
1.685	5.942	6.1295
1.69	5.9831	6.0433
1.695	5.942	6.165
1.7	5.9471	6.1396
1.705	5.8649	5.9977
1.71	5.8751	6.0788
1.715	5.9368	6.1041
1.72	5.834	6.0534
1.725	5.8289	6.1092
1.73	5.9831	6.0433
1.735	5.978	6.094
1.74	5.9882	6.1244
1.745	6.0191	6.2562
1.75	6.0756	6.3728
1.755	6.1424	6.3627
1.76	6.2247	6.3779
1.765	6.3018	6.4945
1.77	6.2093	6.4033
1.775	6.2812	6.4083
1.78	6.2658	6.4337
1.785	6.3275	6.3576
1.79	6.2504	6.3728
1.795	6.348	6.4996
1.8	6.3583	6.3171
1.805	6.2915	6.4185
1.81	6.2658	6.4337
1.815	6.3018	6.3323
1.82	6.1681	6.3069
1.825	6.199	6.2765
1.83	6.2709	6.383
1.835	6.1579	6.2461
1.84	6.1681	6.2664
1.845	6.2247	6.3221
1.85	6.1373	6.241
1.855	6.0448	6.1498
1.86	6.1681	6.2005
1.865	6.1527	6.2055
1.87	6.0037	6.1447
1.875	6.0551	6.1498
1.88	6.091	6.2309
1.885	5.9574	6.1396
1.89	5.9882	6.0433
1.895	5.9677	6.1599
1.9	6.0242	6.1396
1.905	5.834	6.0332
1.91	5.9368	6.0433
1.915	5.9163	5.9723
1.92	5.7158	5.9368
1.925	5.87	5.9977
1.93	5.9214	6.0382
1.935	5.7826	5.9977
1.94	5.7672	5.9267
1.945	5.834	5.9622
1.95	5.8289	6.023
1.955	5.685	5.7898
1.96	5.7466	5.8557
1.965	5.7466	5.9926
1.97	5.6747	5.9571
1.975	5.7312	5.8506
1.98	5.6952	5.8658
1.985	5.6695	5.8456
1.99	5.6387	5.8202
1.995	5.649	5.876
2	5.6644	5.9368
2.005	5.6336	5.7847
2.01	5.5924	5.8608
2.015	5.6695	5.8405
2.02	5.5102	5.7999
2.025	5.5565	5.8151
2.03	5.6438	5.8354
2.035	5.5308	5.8101
2.04	5.5513	5.7847
2.045	5.6541	5.7695
2.05	5.5565	5.7543
2.055	5.4639	5.5921
2.06	5.5205	5.7391
2.065	5.5462	5.7543
2.07	5.4125	5.7442
2.075	5.4691	5.734
2.08	5.5616	5.8405
2.085	5.4948	5.8354
2.09	5.6079	5.8912
2.095	5.6695	5.9216
2.1	5.7158	5.8963
2.105	5.7107	5.9672
2.11	5.6747	5.9875
2.115	5.7878	5.9977
2.12	5.7466	5.9064
2.125	5.6747	5.9419
2.13	5.8032	6.0585
2.135	5.7621	6.0636
2.14	5.7672	5.9622
2.145	5.798	5.952
2.15	5.8443	6.0332
2.155	5.7209	5.8963
2.16	5.7209	5.9013
2.165	5.7569	5.9774
2.17	5.7004	5.8304
2.175	5.7209	5.8811
2.18	5.7775	5.9723
2.185	5.7107	5.9368
2.19	5.6438	5.8709
2.195	5.7672	5.9064
2.2	5.6798	5.947
2.205	5.6695	5.8861
2.21	5.7158	5.8811
2.215	5.7261	5.9825
2.22	5.5873	5.8405
2.225	5.5873	5.9571
2.23	5.7004	5.9013
2.235	5.5976	5.8861
2.24	5.5924	5.9368
2.245	5.6798	6.1345
2.25	5.798	6.3171
2.255	5.7107	6.2714
2.26	5.8032	6.3678
2.265	5.9317	6.3475
2.27	5.906	6.3475
2.275	5.9111	6.3171
2.28	6.0139	6.2866
2.285	6.0037	6.0991
2.29	5.9831	6.1548
2.295	6.0653	6.1802
2.3	6.0499	6.2157
2.305	6.0088	6.1751
2.31	6.0859	6.1447
2.315	6.1167	6.0788
2.32	6.0448	6.1599
2.325	6.0294	6.1143
2.33	6.0705	6.165
2.335	6.0448	6.1599
2.34	6.1013	6.0889
2.345	6.1322	6.1599
2.35	6.1322	6.17
2.355	6.0088	6.1396
2.36	6.163	6.1244
2.365	6.2144	6.2258
2.37	6.1322	6.1396
2.375	6.0602	6.1548
2.38	6.1681	6.2005
2.385	6.1322	6.2461
2.39	6.0294	6.165
2.395	6.0705	6.241
2.4	6.1527	6.2562
2.405	6.1836	6.3069
2.41	6.3429	6.4337
2.415	6.3686	6.5148
2.42	6.3223	6.4742
2.425	6.42	6.6466
2.43	6.4251	6.7074
2.435	6.4817	6.672
2.44	6.5022	6.5553
2.445	6.5177	6.7531
2.45	6.5177	6.6821
2.455	6.3943	6.606
2.46	6.4817	6.6973
2.465	6.5691	6.7176
2.47	6.5074	6.6618
2.475	6.4303	6.7024
2.48	6.5793	6.7125
2.485	6.4406	6.5553
2.49	6.3583	6.5604
2.495	6.4354	6.5858
2.5	6.4714	6.5148
2.505	6.3635	6.5148
2.51	6.3635	6.4489
2.515	6.3583	6.5097
2.52	6.2864	6.4134
2.525	6.3583	6.3678
2.53	6.4251	6.4337
2.535	6.199	6.3678
2.54	6.2607	6.388
2.545	6.3326	6.454
2.55	6.3018	6.3475
2.555	6.163	6.2664
2.56	6.2298	6.3272
2.565	6.2812	6.2512
2.57	6.1116	6.2866
2.575	6.2144	6.2359
2.58	6.2555	6.2664
2.585	6.1681	6.2866
2.59	6.1013	6.2714
2.595	6.1938	6.2765
2.6	6.1733	6.2207
2.605	6.091	6.2613
2.61	6.1167	6.2613
2.615	6.0602	6.2562
2.62	6.0396	6.165
2.625	5.9985	6.2005
2.63	5.9882	6.2106
2.635	5.9317	6.2613
2.64	5.9677	6.1548
2.645	6.0088	6.2207
2.65	5.9831	6.2613
2.655	5.9934	6.2005
2.66	6.0345	6.2055
2.665	6.0551	6.2005
2.67	5.9471	6.2055
2.675	6.0037	6.1396
2.68	6.0653	6.165
2.685	6.0294	6.2106
2.69	5.9471	6.1852
2.695	6.0396	6.241
2.7	5.9368	6.165
2.705	5.8443	6.0179
2.71	5.9214	6.1396
2.715	6.0448	6.17
2.72	5.9111	6.1447
2.725	6.0139	6.2917
2.73	6.091	6.3171
2.735	6.0345	6.3323
2.74	6.091	6.4337
2.745	6.2144	6.5908
2.75	6.3326	6.5249
2.755	6.2658	6.53
2.76	6.3069	6.53
2.765	6.4714	6.6111
2.77	6.348	6.5351
2.775	6.4046	6.6922
2.78	6.5536	6.6365
2.785	6.4406	6.5908
2.79	6.4406	6.6517
2.795	6.605	6.7987
2.8	6.5793	6.6365
2.805	6.4508	6.5756
2.81	6.5125	6.606
2.815	6.5022	6.5908
2.82	6.4303	6.5553
2.825	6.492	6.5756
2.83	6.4971	6.606
2.835	6.5434	6.5858
2.84	6.4406	6.5249
2.845	6.4971	6.7074
2.85	6.5742	6.6365
2.855	6.4251	6.5097
2.86	6.4663	6.601
2.865	6.4971	6.6162
2.87	6.3429	6.4692
2.875	6.4046	6.5097
2.88	6.456	6.5553
2.885	6.3892	6.4337
2.89	6.3789	6.4996
2.895	6.42	6.5148
2.9	6.3121	6.4793
2.905	6.3635	6.4692
2.91	6.2966	6.459
2.915	6.384	6.4337
2.92	6.2401	6.4083
2.925	6.1681	6.383
2.93	6.2607	6.4286
2.935	6.2452	6.3475
2.94	6.1116	6.2714
2.945	6.163	6.2866
2.95	6.2041	6.312
2.955	6.1938	6.2562
2.96	6.1784	6.2816
2.965	6.1424	6.2461
2.97	6.0242	6.241
2.975	6.0962	6.2968
2.98	6.2144	6.2765
2.985	6.0756	6.2816
2.99	6.0551	6.2866
2.995	6.2247	6.3019
3	6.1733	6.241
3.005	6.0499	6.2613
3.01	6.0808	6.2512
3.015	6.0808	6.2613
3.02	6.0294	6.2512
3.025	6.0139	6.1903
3.03	6.0653	6.1852
3.035	6.0088	6.2005
3.04	6.0242	6.2461
3.045	5.9368	6.2309
3.05	6.0242	6.2664
3.055	6.0705	6.2664
3.06	6.1527	6.3678
3.065	6.2298	6.4945
3.07	6.2041	6.454
3.075	6.348	6.6415
3.08	6.4097	6.677
3.085	6.4251	6.5959
3.09	6.384	6.5807
3.095	6.5896	6.6669
3.1	6.4714	6.7277
3.105	6.4971	6.6263
3.11	6.5845	6.677
3.115	6.6513	6.7784
3.12	6.5125	6.6821
3.125	6.5691	6.6872
3.13	6.6462	6.7379
3.135	6.605	6.6314
3.14	6.5588	6.6111
3.145	6.5742	6.7581
3.15	6.5588	6.7074
3.155	6.5125	6.601
3.16	6.5896	6.6872
3.165	6.6513	6.7683
3.17	6.5639	6.6517
3.175	6.5485	6.7024
3.18	6.6256	6.6314
3.185	6.5691	6.6263
3.19	6.4868	6.6162
3.195	6.5382	6.606
3.2	6.5742	6.672
3.205	6.4971	6.5655
3.21	6.5177	6.5807
3.215	6.5588	6.5959
3.22	6.4971	6.5047
3.225	6.5022	6.53
3.23	6.5125	6.5858
3.235	6.3892	6.5553
3.24	6.384	6.4083
3.245	6.4765	6.5249
3.25	6.4303	6.5706
3.255	6.3943	6.459
3.26	6.3892	6.4387
3.265	6.3943	6.4996
3.27	6.3326	6.4337
3.275	6.3172	6.3982
3.28	6.4149	6.4692
3.285	6.2709	6.4033
3.29	6.2812	6.3931
3.295	6.2864	6.4033
3.3	6.3018	6.4083
3.305	6.2555	6.3576
3.31	6.2504	6.3678
3.315	6.2658	6.3982
3.32	6.2041	6.2765
3.325	6.2195	6.4438
3.33	6.2864	6.4134
3.335	6.235	6.2664
3.34	6.0962	6.2714
3.345	6.2247	6.388
3.35	6.2144	6.3576
3.355	6.1013	6.3424
3.36	6.127	6.3373
3.365	6.163	6.2106
3.37	6.0653	6.3373
3.375	6.0808	6.1954
3.38	6.1424	6.2816
3.385	6.0859	6.2866
3.39	6.0499	6.3019
3.395	6.1681	6.388
3.4	6.2041	6.3982
3.405	6.2401	6.4945
3.41	6.3172	6.606
3.415	6.4149	6.7125
3.42	6.4046	6.7125
3.425	6.4663	6.6213
3.43	6.5536	6.6872
3.435	6.5793	6.6415
3.44	6.5434	6.7531
3.445	6.6307	6.7632
3.45	6.6359	6.8241
3.455	6.5434	6.6821
3.46	6.6821	6.7835
3.465	6.7181	6.8241
3.47	6.6256	6.7227
3.475	6.5896	6.6973
3.48	6.7335	6.7227
3.485	6.641	6.7328
3.49	6.5485	6.7024
3.495	6.6616	6.7835
3.5	6.6616	6.7074
3.505	6.5228	6.7277
3.51	6.6102	6.6872
3.515	6.6924	6.7328
3.52	6.5588	6.7176
3.525	6.6102	6.6872
3.53	6.7027	6.7379
3.535	6.5382	6.5655
3.54	6.5125	6.5858
3.545	6.5999	6.672
3.55	6.5588	6.6922
3.555	6.456	6.606
3.56	6.5434	6.6669
3.565	6.5793	6.6517
3.57	6.3994	6.6415
3.575	6.4354	6.6517
3.58	6.5382	6.6669
3.585	6.3583	6.5351
3.59	6.3737	6.5249
3.595	6.4817	6.5706
3.6	6.492	6.5858
3.605	6.3583	6.4438
3.61	6.3583	6.4641
3.615	6.3994	6.4742
3.62	6.1836	6.4134
3.625	6.2812	6.4286
3.63	6.3378	6.4945
3.635	6.2298	6.3373
3.64	6.127	6.3323
3.645	6.2401	6.3019
3.65	6.1784	6.2613
3.655	6.1938	6.3272
3.66	6.1065	6.3931
3.665	6.2298	6.3526
3.67	6.091	6.2562
3.675	6.127	6.2917
3.68	6.2144	6.2968
3.685	6.0859	6.2512
3.69	6.0345	6.2562
3.695	6.0962	6.2765
3.7	6.0859	6.1852
3.705	6.0191	6.2309
3.71	6.0037	6.312
3.715	6.127	6.165
3.72	5.9831	6.17
3.725	5.9934	6.1852
3.73	5.9728	6.1852
3.735	6.0037	6.1751
3.74	6.0242	6.2917
3.745	6.1476	6.4692
3.75	6.199	6.4641
3.755	6.2144	6.4337
3.76	6.2144	6.6213
3.765	6.3018	6.6365
3.77	6.2864	6.6466
3.775	6.3326	6.6669
3.78	6.5228	6.6517
3.785	6.4149	6.5908
3.79	6.3737	6.5553
3.795	6.5279	6.7379
3.8	6.5279	6.7277
3.805	6.4406	6.6567
3.81	6.456	6.6365
3.815	6.5177	6.6821
3.82	6.4714	6.5959
3.825	6.5022	6.53
3.83	6.4714	6.6111
3.835	6.4149	6.6466
3.84	6.4457	6.5908
3.845	6.4714	6.5959
3.85	6.4508	6.601
3.855	6.4508	6.6111
3.86	6.4971	6.5908
3.865	6.384	6.5756
3.87	6.3583	6.5553
3.875	6.42	6.5553
3.88	6.492	6.601
3.885	6.3686	6.4945
3.89	6.3686	6.5047
3.895	6.4149	6.5249
3.9	6.348	6.4844
3.905	6.3275	6.4692
3.91	6.4817	6.53
3.915	6.3635	6.5249
3.92	6.2658	6.3526
3.925	6.2658	6.4286
3.93	6.3378	6.4844
3.935	6.2401	6.4489
3.94	6.2247	6.3931
3.945	6.2915	6.4438
3.95	6.1887	6.383
3.955	6.2401	6.2562
3.96	6.2298	6.3982
3.965	6.1527	6.2968
3.97	6.1116	6.3019
3.975	6.1116	6.2866
3.98	6.1167	6.2816
3.985	6.0705	6.2461
3.99	6.0396	6.1954
3.995	6.1013	6.2106
4	6.0191	6.1802
4.005	5.9934	6.2309
4.01	6.0139	6.2309
4.015	6.0499	6.312
4.02	6.0037	6.1954
4.025	5.9985	6.1599
4.03	6.0448	6.2309
4.035	5.942	6.2664
4.04	5.942	6.1852
4.045	6.0396	6.2157
4.05	5.9728	6.2359
4.055	5.9163	6.0839
4.06	6.0139	6.1852
4.065	6.0037	6.241
4.07	5.8494	6.0686
4.075	5.8854	6.1244
4.08	5.8854	6.2055
4.085	5.8649	6.1193
4.09	5.9728	6.1599
4.095	6.0653	6.3678
4.1	6.0808	6.3221
4.105	6.0808	6.4438
4.11	6.1887	6.5655
4.115	6.3275	6.5807
4.12	6.2452	6.4134
4.125	6.3121	6.5452
4.13	6.3223	6.6314
4.135	6.3223	6.5452
4.14	6.3121	6.5351
4.145	6.4251	6.7277
4.15	6.4303	6.5401
4.155	6.3635	6.5807
4.16	6.4714	6.6567
4.165	6.3737	6.6111
4.17	6.2864	6.4742
4.175	6.3223	6.5249
4.18	6.456	6.5452
4.185	6.3635	6.5097
4.19	6.3635	6.5452
4.195	6.3326	6.6162
4.2	6.3994	6.4996
4.205	6.2915	6.5249
4.21	6.348	6.5553
4.215	6.4149	6.5908
4.22	6.3275	6.388
4.225	6.3583	6.4945
4.23	6.3275	6.4692
4.235	6.3018	6.454
4.24	6.235	6.4083
4.245	6.2761	6.5148
4.25	6.2555	6.5401
4.255	6.2607	6.4387
4.26	6.3583	6.4083
4.265	6.2247	6.3779
4.27	6.1887	6.3069
4.275	6.1322	6.2816
4.28	6.2195	6.4641
4.285	6.1527	6.3171
4.29	6.1219	6.3019
4.295	6.1424	6.312
4.3	6.199	6.2917
4.305	6.0551	6.2765
4.31	6.1219	6.3576
4.315	6.1065	6.3272
4.32	5.9985	6.3069
4.325	6.0396	6.3019
4.33	6.1424	6.3982
4.335	6.0037	6.1852
4.34	5.9471	6.241
4.345	6.0551	6.3171
4.35	5.978	6.2461
4.355	5.942	6.1498
4.36	5.9985	6.2359
4.365	6.0499	6.2765
4.37	5.9008	6.165
4.375	6.0294	6.2461
4.38	6.0191	6.2512
4.385	5.8957	6.1548
4.39	5.9111	6.165
4.395	5.9008	6.2664
4.4	5.9163	6.1396
4.405	5.8494	6.1244
4.41	5.978	6.1498
4.415	5.9317	6.2461
4.42	5.8494	6.094
4.425	5.9266	6.0991
4.43	5.9111	6.2917
4.435	5.9677	6.2816
4.44	5.9266	6.2309
4.445	6.1167	6.4438
4.45	6.0705	6.5553
4.455	6.1167	6.5148
4.46	6.2093	6.5047
4.465	6.2966	6.7429
4.47	6.2555	6.5807
4.475	6.2966	6.5351
4.48	6.3121	6.6263
4.485	6.2555	6.5706
4.49	6.3789	6.5553
4.495	6.42	6.5655
4.5	6.4406	6.6213
4.505	6.3121	6.6213
4.51	6.3892	6.5706
4.515	6.4097	6.5553
4.52	6.3121	6.5503
4.525	6.3378	6.5503
4.53	6.3892	6.5351
4.535	6.3069	6.5959
4.54	6.2864	6.5452
4.545	6.4406	6.5351
4.55	6.3789	6.5047
4.555	6.3018	6.5097
4.56	6.3069	6.5249
4.565	6.3018	6.5351
4.57	6.2401	6.4945
4.575	6.2915	6.4692
4.58	6.2452	6.4844
4.585	6.2041	6.3931
4.59	6.235	6.4489
4.595	6.2864	6.4387
4.6	6.1938	6.3982
4.605	6.1887	6.3982
4.61	6.2093	6.383
4.615	6.199	6.4185
4.62	6.1065	6.2359
4.625	6.1733	6.383
4.63	6.1527	6.3424
4.635	6.1116	6.3779
4.64	6.0602	6.2461
4.645	6.1219	6.2512
4.65	6.0448	6.2664
4.655	5.9574	6.241
4.66	6.0294	6.1903
4.665	6.0396	6.1751
4.67	5.8751	6.1396
4.675	5.906	6.1498
4.68	6.0294	6.1751
4.685	5.7775	6.1143
4.69	5.9214	6.165
4.695	5.8751	6.1548
4.7	5.8854	6.1345
4.705	5.834	6.1295
4.71	5.9008	6.0737
4.715	5.8649	6.0534
4.72	5.8186	5.9774
4.725	5.7518	5.9825
4.73	5.87	6.1345
4.735	5.7107	5.9774
4.74	5.6695	5.9875
4.745	5.7415	5.9774
4.75	5.6541	5.9318
4.755	5.6438	5.8405
4.76	5.685	5.9216
4.765	5.6695	5.8861
4.77	5.6593	5.9774
4.775	5.6901	5.9064
4.78	5.7518	6.0636
4.785	5.7004	5.9723
4.79	5.7107	6.2055
4.795	5.942	6.4235
4.8	5.942	6.2816
4.805	5.8906	6.2664
4.81	5.9831	6.2714
4.815	6.0602	6.2005
4.82	5.8957	6.2309
4.825	5.9882	6.3475
4.83	6.0756	6.2613
4.835	5.9266	6.2765
4.84	6.0756	6.2461
4.845	6.1527	6.2816
4.85	6.0037	6.2359
4.855	5.9934	6.0686
4.86	6.0037	6.2816
4.865	6.0448	6.2207
4.87	5.9728	6.1345
4.875	5.9985	6.2106
4.88	6.0037	6.1396
4.885	5.9368	6.0839
4.89	5.9163	6.0129
4.895	5.9882	6.1802
4.9	5.9523	6.1345
4.905	5.8289	6.1193
4.91	5.8751	6.0484
4.915	5.8854	6.1396
4.92	5.7415	5.9064
4.925	5.8443	5.9875
4.93	5.8803	6.1143
4.935	5.834	6.0788
4.94	5.7878	5.9267
4.945	5.7415	6.094
4.95	5.798	5.9571
4.955	5.6695	5.9165
4.96	5.6747	5.952
4.965	5.7364	5.9977
4.97	5.6747	5.8557
4.975	5.6644	5.9267
4.98	5.7569	6.0686
4.985	5.6438	5.9165
4.99	5.5359	5.8557
4.995	5.5822	5.9368
5	5.6027	5.9267
5.005	5.4999	5.8354
5.01	5.6747	5.8861
5.015	5.6438	5.8151
5.02	5.5667	5.8354
5.025	5.5205	5.9571
5.03	5.6387	6.0382
5.035	5.6079	5.9926
5.04	5.5616	5.8405
5.045	5.6387	5.952
5.05	5.5667	5.7797
5.055	5.5308	5.7695
5.06	5.6079	5.8405
5.065	5.5924	5.8557
5.07	5.5102	5.7695
5.075	5.4794	5.8811
5.08	5.5565	5.9419
5.085	5.5153	5.9216
5.09	5.4588	5.8304
5.095	5.4896	5.8709
5.1	5.5462	5.952
5.105	5.5308	5.9368
5.11	5.6593	6.2106
5.115	5.8083	6.3931
5.12	5.7209	6.4844
5.125	5.87	6.6669
5.13	6.0808	6.7328
5.135	6.0396	6.7835
5.14	6.1322	6.8646
5.145	6.2452	6.8139
5.15	6.2709	6.7429
5.155	6.3069	6.6415
5.16	6.3378	6.5858
5.165	6.3994	6.5959
5.17	6.2966	6.6263
5.175	6.3275	6.7328
5.18	6.4457	6.7024
5.185	6.3326	6.5655
5.19	6.3121	6.5452
5.195	6.3737	6.6314
5.2	6.3635	6.5249
5.205	6.3121	6.5553
5.21	6.3994	6.5047
5.215	6.3429	6.53
5.22	6.3069	6.4083
5.225	6.235	6.4945
5.23	6.3326	6.383
5.235	6.2658	6.2968
5.24	6.235	6.3576
5.245	6.3429	6.383
5.25	6.1887	6.3627
5.255	6.1424	6.383
5.26	6.235	6.4185
5.265	6.2812	6.3424
5.27	6.0859	6.2359
5.275	6.1579	6.3171
5.28	6.2144	6.4083
5.285	6.0499	6.3576
5.29	6.1013	6.3221
5.295	6.1219	6.4033
5.3	6.0859	6.4083
5.305	5.942	6.2866
5.31	6.1116	6.3678
5.315	5.9934	6.3475
5.32	5.9317	6.2866
5.325	5.9728	6.3272
5.33	6.0499	6.3323
5.335	5.9934	6.3019
5.34	5.8751	6.2157
5.345	5.9214	6.3373
5.35	5.9266	6.3678
5.355	5.9111	6.2765
5.36	5.9523	6.3069
5.365	5.9882	6.4185
5.37	5.8854	6.3373
5.375	5.9317	6.2866
5.38	5.9266	6.2917
5.385	5.8906	6.2005
5.39	5.8443	6.1447
5.395	5.9214	6.17
5.4	5.8135	6.1345
5.405	5.9163	6.1802
5.41	5.9677	6.1244
5.415	5.9368	6.2258
5.42	5.8392	6.2258
5.425	5.8854	6.1903
5.43	6.0139	6.2664
5.435	5.9368	6.2765
5.44	6.0448	6.3728
5.445	6.127	6.4996
5.45	6.1167	6.5199
5.455	6.163	6.5097
5.46	6.235	6.5148
5.465	6.3583	6.5858
5.47	6.3275	6.4844
5.475	6.2761	6.6567
5.48	6.4508	6.5908
5.485	6.3378	6.6618
5.49	6.348	6.6213
5.495	6.4406	6.6466
5.5	6.3892	6.5655
5.505	6.3121	6.5807
5.51	6.4508	6.6872
5.515	6.3994	6.7176
5.52	6.3737	6.6669
5.525	6.3737	6.6517
5.53	6.4406	6.7024
5.535	6.3635	6.6263
5.54	6.3737	6.6821
5.545	6.3789	6.6821
5.55	6.3686	6.601
5.555	6.2607	6.672
5.56	6.3943	6.6365
5.565	6.4611	6.6365
5.57	6.2709	6.5756
5.575	6.3583	6.6111
5.58	6.348	6.6213
5.585	6.2966	6.5604
5.59	6.2812	6.4387
5.595	6.3583	6.4692
5.6	6.2864	6.5148
5.605	6.1219	6.3779
5.61	6.3378	6.5148
5.615	6.2504	6.4793
5.62	6.2247	6.4185
5.625	6.2401	6.4134
5.63	6.2401	6.459
5.635	6.0962	6.3728
5.64	6.1681	6.3221
5.645	6.2452	6.4945
5.65	6.1579	6.3931
5.655	6.0448	6.3627
5.66	6.1579	6.2917
5.665	6.1784	6.3931
5.67	5.9882	6.2258
5.675	6.1116	6.388
5.68	6.1733	6.4033
5.685	5.9882	6.2968
5.69	6.0294	6.2866
5.695	6.1116	6.3373
5.7	6.1322	6.241
5.705	6.0602	6.1954
5.71	6.0037	6.3779
5.715	6.127	6.3931
5.72	6.0499	6.2664
5.725	6.0088	6.2562
5.73	6.0191	6.3424
5.735	5.9934	6.2157
5.74	5.942	6.3019
5.745	6.0499	6.2816
5.75	6.0139	6.3373
5.755	6.0191	6.4235
5.76	6.1219	6.4996
5.765	6.2607	6.53
5.77	6.2093	6.5199
5.775	6.3069	6.6263
5.78	6.384	6.8139
5.785	6.4508	6.748
5.79	6.384	6.6669
5.795	6.4663	6.8088
5.8	6.456	6.7429
5.805	6.4406	6.8088
5.81	6.5022	6.9001
5.815	6.5742	6.89
5.82	6.5279	6.819
5.825	6.605	6.9153
5.83	6.6153	6.8595
5.835	6.5793	6.8494
5.84	6.5125	6.8342
5.845	6.605	6.8545
5.85	6.5125	6.7328
5.855	6.5331	6.8697
5.86	6.5536	6.8748
5.865	6.6307	6.8494
5.87	6.4868	6.7784
5.875	6.5536	6.8088
5.88	6.5485	6.8697
5.885	6.5177	6.8241
5.89	6.5125	6.8393
5.895	6.5948	6.8088
5.9	6.5022	6.8393
5.905	6.456	6.7734
5.91	6.4714	6.8241
5.915	6.4611	6.8748
5.92	6.4406	6.7784
5.925	6.5588	6.7835
5.93	6.4971	6.7429
5.935	6.3326	6.7074
5.94	6.3686	6.6314
5.945	6.42	6.8139
5.95	6.3789	6.6973
5.955	6.348	6.6263
5.96	6.3378	6.677
5.965	6.3583	6.6365
5.97	6.2555	6.672
5.975	6.348	6.6466
5.98	6.3686	6.677
5.985	6.2504	6.5047
5.99	6.2298	6.5706
5.995	6.3532	6.5249
6	6.2607	6.4945
6.005	6.1938	6.4489
6.01	6.2812	6.5148
6.015	6.1836	6.5047
6.02	6.1784	6.5706
6.025	6.2401	6.5097
6.03	6.235	6.6162
6.035	6.1322	6.5199
6.04	6.127	6.4641
6.045	6.2452	6.4996
6.05	6.1527	6.459
6.055	6.1219	6.4337
6.06	6.2812	6.5503
6.065	6.2298	6.5553
6.07	6.0962	6.4185
6.075	6.127	6.3627
6.08	6.2041	6.5351
6.085	6.1167	6.4083
6.09	6.127	6.5097
6.095	6.2761	6.7074
6.1	6.2658	6.6821
6.105	6.2195	6.6922
6.11	6.2709	6.7429
6.115	6.3737	6.89
6.12	6.4303	6.8849
6.125	6.492	6.8393
6.13	6.6667	6.9457
6.135	6.605	6.966
6.14	6.605	6.9204
6.145	6.6564	7.0421
6.15	6.6821	7.0116
6.155	6.5485	6.9457
6.16	6.7284	7.0471
6.165	6.7798	6.9863
6.17	6.5999	6.9559
6.175	6.6873	6.9711
6.18	6.7747	6.9508
6.185	6.6256	6.895
6.19	6.7233	6.89
6.195	6.7849	6.9863
6.2	6.6102	6.9204
6.205	6.6359	6.9305
6.21	6.677	6.9863
6.215	6.7027	6.9508
6.22	6.4971	6.8849
6.225	6.6667	6.89
6.23	6.6667	6.8697
6.235	6.6256	6.8443
6.24	6.641	6.7683
6.245	6.677	6.9407
6.25	6.6307	6.8393
6.255	6.5331	6.7886
6.26	6.5845	6.8342
6.265	6.6307	6.819
6.27	6.5434	6.7936
6.275	6.5536	6.8342
6.28	6.6256	6.7987
6.285	6.4817	6.6922
6.29	6.4611	6.7379
6.295	6.4508	6.7936
6.3	6.4457	6.7176
6.305	6.4046	6.7227
6.31	6.3943	6.7531
6.315	6.3737	6.7632
6.32	6.3429	6.5452
6.325	6.4149	6.606
6.33	6.3892	6.6517
6.335	6.2401	6.5452
6.34	6.235	6.5553
6.345	6.3275	6.601
6.35	6.3378	6.5959
6.355	6.235	6.5503
6.36	6.2864	6.5706
6.365	6.2915	6.5807
6.37	6.2093	6.5401
6.375	6.2041	6.5503
6.38	6.2298	6.5908
6.385	6.1065	6.4742
6.39	6.1836	6.4185
6.395	6.1938	6.4641
6.4	6.091	6.4185
6.405	6.1579	6.3779
6.41	6.1527	6.4286
6.415	6.1167	6.3728
6.42	6.0653	6.3475
6.425	6.0139	6.5199
6.43	6.1579	6.4945
6.435	6.0551	6.4235
6.44	6.091	6.4387
6.445	6.1733	6.5655
6.45	6.2093	6.5807
6.455	6.2555	6.6517
6.46	6.3635	6.7936
6.465	6.3686	6.8443
6.47	6.348	6.8748
6.475	6.42	6.9001
6.48	6.5228	6.9609
6.485	6.4508	6.8139
6.49	6.456	6.8849
6.495	6.6153	6.966
6.5	6.5536	6.9255
6.505	6.5536	6.9457
6.51	6.6205	6.9964
6.515	6.5896	6.9407
6.52	6.5279	6.8646
6.525	6.5279	6.8646
6.53	6.5948	6.8798
6.535	6.4765	6.9102
6.54	6.5382	6.8342
6.545	6.6719	6.9863
6.55	6.5074	6.9001
6.555	6.4611	6.8646
6.56	6.5639	6.9457
6.565	6.5845	6.9255
6.57	6.4457	6.7176
6.575	6.4868	6.8443
6.58	6.5845	6.8342
6.585	6.4457	6.7987
6.59	6.4817	6.819
6.595	6.4971	6.8088
6.6	6.5125	6.7987
6.605	6.42	6.6314
6.61	6.5074	6.9153
6.615	6.4817	6.7632
6.62	6.4611	6.6517
6.625	6.4251	6.6618
6.63	6.4097	6.7835
6.635	6.42	6.7227
6.64	6.3172	6.6213
6.645	6.42	6.672
6.65	6.348	6.6517
6.655	6.3326	6.7074
6.66	6.3994	6.672
6.665	6.3532	6.6466
6.67	6.2093	6.5452
6.675	6.3223	6.5706
6.68	6.3326	6.6213
6.685	6.2452	6.5503
6.69	6.2452	6.5401
6.695	6.3635	6.5959
6.7	6.1784	6.6263
6.705	6.127	6.5503
6.71	6.1938	6.53
6.715	6.2195	6.4641
6.72	6.199	6.53
6.725	6.199	6.4945
6.73	6.1887	6.5097
6.735	6.0705	6.4894
6.74	6.1424	6.5148
6.745	6.2041	6.5199
6.75	6.163	6.4996
6.755	6.0756	6.5452
6.76	6.1527	6.4742
6.765	6.1733	6.5604
6.77	6.0499	6.4692
6.775	6.0859	6.53
6.78	6.1938	6.5199
6.785	6.091	6.3779
6.79	6.2144	6.6162
6.795	6.2504	6.6669
6.8	6.2504	6.7429
6.805	6.3069	6.8038
6.81	6.4611	6.9711
6.815	6.5125	6.895
6.82	6.4508	6.89
6.825	6.4971	6.9204
6.83	6.5948	6.9305
6.835	6.4868	6.89
6.84	6.5999	6.9812
6.845	6.6462	7.0775
6.85	6.6564	6.9508
6.855	6.5639	6.9711
6.86	6.6719	7.0268
6.865	6.6667	6.9407
6.87	6.5691	6.89
6.875	6.5896	7.0167
6.88	6.6616	6.895
6.885	6.6359	6.8393
6.89	6.5279	6.9457
6.895	6.6153	6.9964
6.9	6.4971	6.895
6.905	6.5279	6.8849
6.91	6.6462	6.9609
6.915	6.677	7.0218
6.92	6.5177	6.89
6.925	6.5382	6.9305
6.93	6.605	6.9812
6.935	6.4765	6.9001
6.94	6.4457	6.8291
6.945	6.6359	6.9255
6.95	6.5022	6.9356
6.955	6.4303	6.7936
6.96	6.4971	6.8088
6.965	6.5177	6.8088
6.97	6.4046	6.7227
6.975	6.4714	6.7936
6.98	6.492	6.8849
6.985	6.3943	6.7835
6.99	6.2864	6.7074
6.995	6.3378	6.8139
7	6.3378	6.7886
7.005	6.2401	6.6466
7.01	6.348	6.6618
7.015	6.3378	6.7227
7.02	6.2966	6.677
7.025	6.2401	6.672
7.03	6.3223	6.6922
7.035	6.2504	6.5351
7.04	6.0859	6.6213
7.045	6.2401	6.601
7.05	6.1938	6.6162
7.055	6.1681	6.5503
7.06	6.235	6.601
7.065	6.1887	6.5908
7.07	6.0191	6.5503
7.075	6.1219	6.5199
7.08	6.0242	6.4286
7.085	6.0345	6.5199
7.09	6.0962	6.4894
7.095	6.1322	6.5401
7.1	6.0191	6.4844
7.105	6.1219	6.4692
7.11	6.0602	6.5452
7.115	6.0191	6.4641
7.12	5.9471	6.4185
7.125	6.0139	6.4185
7.13	5.9625	6.4083
7.135	5.9471	6.383
7.14	5.9831	6.4185
7.145	6.0756	6.5503
7.15	6.0808	6.7176
7.155	6.1938	6.7632
7.16	6.2041	6.8545
7.165	6.3121	6.8393
7.17	6.2452	6.7835
7.175	6.3994	6.8697
7.18	6.4097	6.8595
7.185	6.3069	6.8748
7.19	6.3943	6.8342
7.195	6.5228	6.9914
7.2	6.5177	6.8494
7.205	6.4663	6.8849
7.21	6.4971	6.9812
7.215	6.4663	6.8393
7.22	6.3737	6.819
7.225	6.4406	6.895
7.23	6.4457	6.8849
7.235	6.4406	6.8393
7.24	6.4046	6.7429
7.245	6.5022	6.8646
7.25	6.4714	6.8038
7.255	6.4406	6.7784
7.26	6.4354	6.8595
7.265	6.4663	6.7734
7.27	6.384	6.7835
7.275	6.4611	6.7886
7.28	6.42	6.8646
7.285	6.3686	6.6466
7.29	6.3583	6.7328
7.295	6.3892	6.7683
7.3	6.3994	6.7379
7.305	6.2966	6.6314
7.31	6.3737	6.7581
7.315	6.3789	6.6872
7.32	6.2761	6.5553
7.325	6.2915	6.6162
7.33	6.2709	6.6821
7.335	6.2864	6.5503
7.34	6.2247	6.5452
7.345	6.3069	6.5908
7.35	6.199	6.5604
7.355	6.1373	6.5452
7.36	6.2195	6.4489
7.365	6.2298	6.606
7.37	6.1579	6.4033
7.375	6.1065	6.4945
7.38	6.199	6.4692
7.385	5.9985	6.383
7.39	6.1013	6.4641
7.395	6.1219	6.4844
7.4	6.0808	6.388
7.405	6.0191	6.388
7.41	6.1527	6.4844
7.415	6.1322	6.4692
7.42	6.0499	6.4033
7.425	6.0294	6.3475
7.43	6.1476	6.4134
7.435	6.0448	6.3221
7.44	6.0653	6.4033
7.445	6.1013	6.454
7.45	5.9934	6.4083
7.455	5.9882	6.3475
7.46	6.0808	6.4438
7.465	6.1065	6.3728
7.47	5.906	6.3221
7.475	5.9677	6.4083
7.48	6.0962	6.3931
7.485	5.9728	6.4033
7.49	6.0139	6.5148
7.495	6.1938	6.5604
7.5	6.1013	6.5807
7.505	6.2298	6.6973
7.51	6.3223	6.8748
7.515	6.2915	6.7936
7.52	6.3532	6.7176
7.525	6.3686	6.8494
7.53	6.4097	6.7632
7.535	6.3069	6.8241
7.54	6.348	6.8139
7.545	6.4406	6.8697
7.55	6.3635	6.7531
7.555	6.2401	6.748
7.56	6.4046	6.8849
7.565	6.492	6.8088
7.57	6.4097	6.7328
7.575	6.4508	6.8545
7.58	6.4046	6.7429
7.585	6.3223	6.7125
7.59	6.3429	6.6618
7.595	6.456	6.7936
7.6	6.3429	6.7328
7.605	6.2709	6.6821
7.61	6.384	6.6618
7.615	6.3789	6.7024
7.62	6.3069	6.6872
7.625	6.3326	6.6517
7.63	6.3686	6.6466
7.635	6.3429	6.5959
7.64	6.2915	6.5706
7.645	6.3429	6.677
7.65	6.3069	6.6263
7.655	6.1733	6.6263
7.66	6.2915	6.601
7.665	6.2607	6.5047
7.67	6.2401	6.4033
7.675	6.1938	6.4337
7.68	6.2247	6.5249
7.685	6.1681	6.4438
7.69	6.1373	6.4742
7.695	6.1733	6.5756
7.7	6.1938	6.4793
7.705	6.1527	6.4083
7.71	6.1733	6.4692
7.715	6.127	6.459
7.72	6.0088	6.388
7.725	6.0808	6.388
7.73	6.091	6.4742
7.735	6.0551	6.4083
7.74	6.0448	6.3323
7.745	6.091	6.3171
7.75	6.0139	6.3627
7.755	5.9266	6.2917
7.76	6.0551	6.383
7.765	6.0859	6.4134
7.77	5.9934	6.2765
7.775	6.0191	6.4235
7.78	6.0808	6.3526
7.785	5.9008	6.2765
7.79	5.9111	6.2968
7.795	5.9934	6.2968
7.8	5.9317	6.3069
7.805	5.87	6.2207
7.81	6.0088	6.3323
7.815	5.942	6.2765
7.82	5.8546	6.2207
7.825	5.87	6.1447
7.83	5.9163	6.2461
7.835	5.87	6.2917
7.84	5.9317	6.4185
7.845	6.0756	6.5401
7.85	6.1116	6.5908
7.855	6.0705	6.5604
7.86	6.1116	6.601
7.865	6.163	6.6365
7.87	6.1887	6.4945
7.875	6.2452	6.6314
7.88	6.3018	6.6466
7.885	6.3069	6.7125
7.89	6.2401	6.6872
7.895	6.2966	6.6669
7.9	6.2966	6.6922
7.905	6.2607	6.5553
7.91	6.2401	6.6314
7.915	6.3994	6.6618
7.92	6.2915	6.5908
7.925	6.2093	6.5959
7.93	6.3018	6.5351
7.935	6.1733	6.454
7.94	6.2658	6.4996
7.945	6.2504	6.5655
7.95	6.235	6.4844
7.955	6.1167	6.4996
7.96	6.199	6.5604
7.965	6.163	6.3931
7.97	6.1322	6.4134
7.975	6.1167	6.3931
7.98	6.2607	6.4235
7.985	6.0499	6.3627
7.99	6.0859	6.3627
7.995	6.1013	6.4083
8	6.0242	6.2816
8.005	6.0088	6.3019
8.01	6.0191	6.3272
8.015	5.9882	6.3069
8.02	5.9266	6.241
8.025	5.8751	6.3019
8.03	5.9523	6.2512
8.035	5.7929	6.0788
8.04	5.8083	6.0889
8.045	5.9111	6.1802
8.05	5.8392	6.1599
8.055	5.8494	6.1295
8.06	5.834	6.2106
8.065	5.7621	6.1852
8.07	5.7209	6.1041
8.075	5.8443	6.0636
8.08	5.798	6.0889
8.085	5.7158	6.0129
8.09	5.6644	6.094
8.095	5.8135	6.1396
8.1	5.6952	6.0332
8.105	5.7209	6.0484
8.11	5.6901	6.1193
8.115	5.6438	6.0281
8.12	5.5616	6.0179
8.125	5.5924	6.023
8.13	5.6952	6.0129
8.135	5.5976	5.9216
8.14	5.6027	5.9774
8.145	5.6438	6.1143
8.15	5.5873	6.0027
8.155	5.4948	5.8861
8.16	5.5102	5.9064
8.165	5.4896	5.8658
8.17	5.4382	5.8253
8.175	5.6181	5.9368
8.18	5.649	6.0281
8.185	5.5616	6.0788
8.19	5.6798	6.1041
8.195	5.7569	6.2714
8.2	5.7415	6.1295
8.205	5.7158	6.094
8.21	5.8289	6.3171
8.215	5.8032	6.2562
8.22	5.7775	6.1599
8.225	5.8854	6.2106
8.23	5.87	6.3171
8.235	5.8135	6.1751
8.24	5.7878	6.2512
8.245	5.8186	6.3221
8.25	5.7878	6.1447
8.255	5.7723	6.1447
8.26	5.8186	6.1802
8.265	5.7621	6.0332
8.27	5.6387	6.094
8.275	5.7261	6.0179
8.28	5.7775	6.0788
8.285	5.6952	6.1143
8.29	5.7364	6.0636
8.295	5.8237	6.1447
8.3	5.7004	6.094
8.305	5.6593	6.0484
8.31	5.7209	6.094
8.315	5.7364	6.0078
8.32	5.6284	5.9571
8.325	5.6336	5.9672
8.33	5.7107	6.0534
8.335	5.5924	6.0078
8.34	5.6747	6.1092
8.345	5.6952	6.1954
8.35	5.6747	6.312
8.355	5.6644	6.4844
8.36	5.8289	6.459
8.365	5.8854	6.53
8.37	5.8032	6.3475
8.375	5.8906	6.459
8.38	5.9831	6.4134
8.385	5.9214	6.2613
8.39	5.8751	6.312
8.395	6.0499	6.383
8.4	5.9728	6.2664
8.405	5.9625	6.2714
8.41	5.978	6.2664
8.415	5.9574	6.2714
8.42	5.9214	6.2664
8.425	5.9882	6.3019
8.43	6.1579	6.2461
8.435	6.0191	6.2005
8.44	5.9882	6.1954
8.445	5.9985	6.2359
8.45	5.9728	6.1193
8.455	5.9163	6.17
8.46	6.127	6.2765
8.465	6.0499	6.1852
8.47	5.9471	6.1244
8.475	5.9985	6.1447
8.48	6.091	6.1954
8.485	5.9574	6.1954
8.49	6.0139	6.1903
8.495	6.0139	6.312
8.5	6.0602	6.2968
8.505	6.0859	6.3373
8.51	6.1219	6.5401
8.515	6.1065	6.5655
8.52	6.1476	6.4083
8.525	6.2041	6.6365
8.53	6.3223	6.6618
8.535	6.235	6.6314
8.54	6.2864	6.606
8.545	6.4046	6.6567
8.55	6.3635	6.6111
8.555	6.2864	6.5858
8.56	6.3583	6.6821
8.565	6.3737	6.5807
8.57	6.2555	6.5807
8.575	6.3121	6.606
8.58	6.2864	6.601
8.585	6.3378	6.6162
8.59	6.2452	6.5249
8.595	6.3429	6.6567
8.6	6.348	6.601
8.605	6.2041	6.4894
8.61	6.2812	6.5756
8.615	6.2452	6.4894
8.62	6.2247	6.3728
8.625	6.2195	6.5047
8.63	6.2555	6.4337
8.635	6.1887	6.3576
8.64	6.1579	6.3323
8.645	6.2041	6.3627
8.65	6.1733	6.3475
8.655	6.0551	6.2765
8.66	6.1476	6.3019
8.665	6.0859	6.2613
8.67	6.091	6.2562
8.675	5.9985	6.2157
8.68	6.0859	6.2258
8.685	6.0705	6.1903
8.69	6.0396	6.17
8.695	6.1167	6.2968
8.7	6.0345	6.2816
8.705	6.0499	6.2157
8.71	6.0653	6.2157
8.715	6.0551	6.2207
8.72	5.9471	6.2258
8.725	5.9831	6.1852
8.73	6.0653	6.2258
8.735	5.9368	6.1193
8.74	5.8957	6.1041
8.745	5.9317	6.2917
8.75	5.9523	6.1903
8.755	5.8751	6.1954
8.76	5.906	6.1447
8.765	5.9214	6.1903
8.77	5.8957	6.0991
8.775	5.942	6.1751
8.78	5.8906	6.2106
8.785	5.8032	6.0889
8.79	5.8237	6.1599
8.795	5.8751	6.1143
8.8	5.7929	6.1244
8.805	5.7055	5.9977
8.81	5.798	6.0636
8.815	5.9008	6.0839
8.82	5.7878	6.0737
8.825	5.8289	6.17
8.83	5.9471	6.3069
8.835	5.9317	6.3576
8.84	5.9831	6.3221
8.845	6.1373	6.3982
8.85	6.0859	6.4033
8.855	6.1219	6.383
8.86	6.1938	6.4894
8.865	6.1938	6.4387
8.87	6.1013	6.3627
8.875	6.2761	6.4894
8.88	6.3635	6.5249
8.885	6.2452	6.5503
8.89	6.3223	6.5503
8.895	6.348	6.5655
8.9	6.2709	6.5199
8.905	6.2093	6.4337
8.91	6.3943	6.4438
8.915	6.3326	6.4641
8.92	6.3018	6.4692
8.925	6.2709	6.5148
8.93	6.3429	6.5706
8.935	6.2761	6.4945
8.94	6.2812	6.4489
8.945	6.2607	6.5148
8.95	6.2709	6.5047
8.955	6.235	6.5097
8.96	6.4097	6.5604
8.965	6.1887	6.459
8.97	6.199	6.3931
8.975	6.199	6.4438
8.98	6.1836	6.383
8.985	6.0242	6.4134
8.99	6.1836	6.383
8.995	6.3223	6.4185
9	6.1681	6.3779
9.005	6.1579	6.2816
9.01	6.1373	6.3678
9.015	6.1322	6.4185
9.02	6.0653	6.3171
9.025	6.1681	6.3373
9.03	6.1527	6.3475
9.035	6.0294	6.3019
9.04	6.0859	6.2562
9.045	6.1219	6.2714
9.05	6.0551	6.2613
9.055	5.9574	6.1802
9.06	6.0962	6.3221
9.065	6.0756	6.2562
9.07	5.9266	6.1244
9.075	6.0396	6.165
9.08	6.0037	6.1903
9.085	5.8649	6.1244
9.09	5.9111	6.2106
9.095	5.9471	6.3526
9.1	5.8289	6.1498
9.105	5.9625	6.1548
9.11	6.0242	6.1599
9.115	5.9317	6.2562
9.12	5.8546	6.0991
9.125	5.8649	6.1751
9.13	5.8906	6.2664
9.135	5.8392	6.1498
9.14	5.8597	6.1041
9.145	5.8751	6.2005
9.15	5.9008	6.2461
9.155	5.8135	6.2309
9.16	5.942	6.3019
9.165	6.0345	6.4083
9.17	5.978	6.4438
9.175	6.1476	6.53
9.18	6.1733	6.5706
9.185	6.2607	6.4793
9.19	6.0859	6.5047
9.195	6.2144	6.6567
9.2	6.2761	6.6872
9.205	6.2247	6.5807
9.21	6.3069	6.601
9.215	6.3326	6.6872
9.22	6.2761	6.6567
9.225	6.2915	6.677
9.23	6.3583	6.7074
9.235	6.3069	6.672
9.24	6.2966	6.6567
9.245	6.3378	6.6973
9.25	6.3583	6.6263
9.255	6.3429	6.6517
9.26	6.3994	6.7125
9.265	6.3223	6.6922
9.27	6.3018	6.7125
9.275	6.3326	6.6973
9.28	6.3275	6.6314
9.285	6.2761	6.5959
9.29	6.2761	6.5604
9.295	6.3737	6.6466
9.3	6.3532	6.6618
9.305	6.2709	6.5706
9.31	6.3121	6.606
9.315	6.2966	6.6872
9.32	6.2401	6.5807
9.325	6.2401	6.5401
9.33	6.2195	6.5351
9.335	6.199	6.454
9.34	6.2093	6.5047
9.345	6.2761	6.5553
9.35	6.1887	6.4438
9.355	6.1219	6.4894
9.36	6.1733	6.5199
9.365	6.1373	6.5097
9.37	6.0808	6.383
9.375	6.1579	6.4033
9.38	6.1836	6.4945
9.385	5.9934	6.312
9.39	6.1322	6.3019
9.395	6.0808	6.4793
9.4	6.0859	6.388
9.405	6.0551	6.2562
9.41	6.0859	6.3728
9.415	5.9625	6.3728
9.42	5.9728	6.3323
9.425	6.0345	6.3069
9.43	6.0191	6.383
9.435	5.942	6.2866
9.44	5.9625	6.2055
9.445	6.0242	6.4185
9.45	5.906	6.2816
9.455	5.9163	6.1903
9.46	5.9317	6.3678
9.465	5.8854	6.2055
9.47	5.8803	6.2309
9.475	5.8237	6.2816
9.48	5.9266	6.2968
9.485	5.8237	6.165
9.49	5.8443	6.1548
9.495	5.9111	6.2866
9.5	5.8597	6.3931
9.505	5.8546	6.388
9.51	6.0448	6.5959
9.515	6.1013	6.6111
9.52	6.0139	6.5199
9.525	6.1322	6.6314
9.53	6.1322	6.6365
9.535	6.1579	6.677
9.54	6.1527	6.5807
9.545	6.3172	6.748
9.55	6.2401	6.6213
9.555	6.2195	6.6415
9.56	6.3121	6.6872
9.565	6.2144	6.5756
9.57	6.2504	6.6567
9.575	6.2864	6.5655
9.58	6.2966	6.606
9.585	6.2247	6.5503
9.59	6.2041	6.5047
9.595	6.2607	6.5756
9.6	6.1527	6.5199
9.605	6.2195	6.5503
9.61	6.2915	6.6314
9.615	6.2966	6.5807
9.62	6.2401	6.6111
9.625	6.3378	6.5047
9.63	6.2504	6.6111
9.635	6.2761	6.4844
9.64	6.2298	6.5452
9.645	6.2298	6.5655
9.65	6.1836	6.5858
9.655	6.163	6.5858
9.66	6.2452	6.4742
9.665	6.1681	6.5452
9.67	6.1116	6.3475
9.675	6.1579	6.4844
9.68	6.1681	6.454
9.685	6.1219	6.4641
9.69	6.1733	6.4438
9.695	6.2864	6.4641
9.7	6.0602	6.3678
9.705	6.0088	6.4033
9.71	6.1527	6.4387
9.715	6.163	6.2765
9.72	6.0756	6.3019
9.725	6.1065	6.3526
9.73	6.1013	6.3475
9.735	6.0088	6.2461
9.74	5.9882	6.3069
9.745	6.1013	6.2917
9.75	5.9008	6.2765
9.755	5.9882	6.2562
9.76	6.0448	6.3678
9.765	5.9677	6.2613
9.77	5.906	6.2258
9.775	5.9471	6.3069
9.78	5.9214	6.2866
9.785	5.8957	6.2005
9.79	5.9111	6.2613
9.795	5.9523	6.2866
9.8	5.8803	6.1903
9.805	5.8186	6.2106
9.81	5.9317	6.3272
9.815	5.9317	6.2562
9.82	5.7518	6.17
9.825	5.8546	6.1599
9.83	5.8649	6.2055
9.835	5.8443	6.1498
9.84	5.8906	6.2664
9.845	5.9368	6.3982
9.85	5.9523	6.4083
9.855	5.942	6.3526
9.86	6.0859	6.4894
9.865	6.1065	6.5047
9.87	6.0962	6.5249
9.875	6.1476	6.5249
9.88	6.3429	6.6111
9.885	6.2195	6.5908
9.89	6.2761	6.6365
9.895	6.2555	6.6973
9.9	6.235	6.5503
9.905	6.1681	6.5503
9.91	6.2709	6.6517
9.915	6.2401	6.6213
9.92	6.1836	6.5047
9.925	6.2709	6.601
9.93	6.2864	6.6973
9.935	6.2658	6.5756
9.94	6.2504	6.6466
9.945	6.3583	6.6567
9.95	6.1836	6.5148
9.955	6.2607	6.4793
9.96	6.2607	6.6466
9.965	6.2144	6.6821
9.97	6.2093	6.4083
9.975	6.1784	6.5148
9.98	6.199	6.5452
9.985	6.127	6.4692
[truncated: 4,002 more rows]
